# Supplementary material for: Simple fabrication and unprecedented visible light response of NiNb2O6/RGO heterojunctions for the degradation of emerging pollutants in water
Source: Royal Society of Chemistry journal article supplement (doi:10.1039/d1nj04693d), 2021-01-01
Supplement: d1nj04693d1.pdf [file d1nj04693d1.pdf]

**Simple fabrication and unprecedented visible light response of NiNb<sub>2</sub>O<sub>6</sub>/RGO  
heterojunctions for the degradation of emerging pollutants in water**

Benjamin Moses Filip Jones<sup>a</sup>, G. Mamba<sup>b</sup>, S.A. Ansari<sup>c</sup>, D. Maruthamani<sup>d</sup>, V. Muthuraj<sup>a\*</sup> T.T.I.  
Nkambule<sup>b</sup>

<sup>a</sup> Department of Chemistry, V.H. N. Senthikumara Nadar College (Autonomous),  
Virudhunagar-626 001, Tamil Nadu, India.

<sup>b</sup> Institute for Nanotechnology and Water Sustainability, College of Science, Engineering and  
Technology, University of South Africa, Florida, 1709, Johannesburg, South Africa.

<sup>c</sup> Department of Physics, College of Science, King Faisal University, P.O. Box 400, Hofuf, Al-  
Ahsa 31982, Saudi Arabia.

<sup>d</sup> Department of Chemistry, PSG College of Technology, Coimbatore - 641 004, India.

**List of Figures and Tables.**

**Figure S1.** EDX spectrum of NiNb<sub>2</sub>O<sub>6</sub>/10wt%RGO.

**Figure S2.** EDX element mapping of the composite NiNb<sub>2</sub>O<sub>6</sub>/10wt%RGO.

**Figure S3:** Survey spectrum of NiNb<sub>2</sub>O<sub>6</sub>/10wt%RGO and NiNb<sub>2</sub>O<sub>6</sub>.

**Figure S4.** DOX and TC removal in the dark using NiNb<sub>2</sub>O<sub>6</sub>/10wt%RGO

**Figure S5.** Kinetic graph for degradation of (a) DOX and (b) TC under simulated light using  
the prepared catalysts

**Figure S6.** Kinetics for effect of NiNb<sub>2</sub>O<sub>6</sub>/10wt%RGO dosage on the degradation of (a) DOX  
and (b) TC.

**Figure S7.** Kinetics for the effect of initial concentration on the degradation of (a) DOX and  
(b) TC.

**Figure S8.** Kinetics for the degradation of (a) DOX and (b) TC at different solution pH

**Figure S9.** Scavenging experiments during the degradation of (a) DOX and (b) TC.

**Figure S10.** (a) Evaluation of the reusability of NiNb<sub>2</sub>O<sub>6</sub>/10wt%RGO for degradation of DOX  
and TC, and (b) XRD patterns of NiNb<sub>2</sub>O<sub>6</sub>/10wt%RGO before and after DOX degradation

**Figure S11.** Mass spectra of DOX and possible intermediates

**Table S1:** Comparative studies of photocatalytic degradation of DOX and TC.

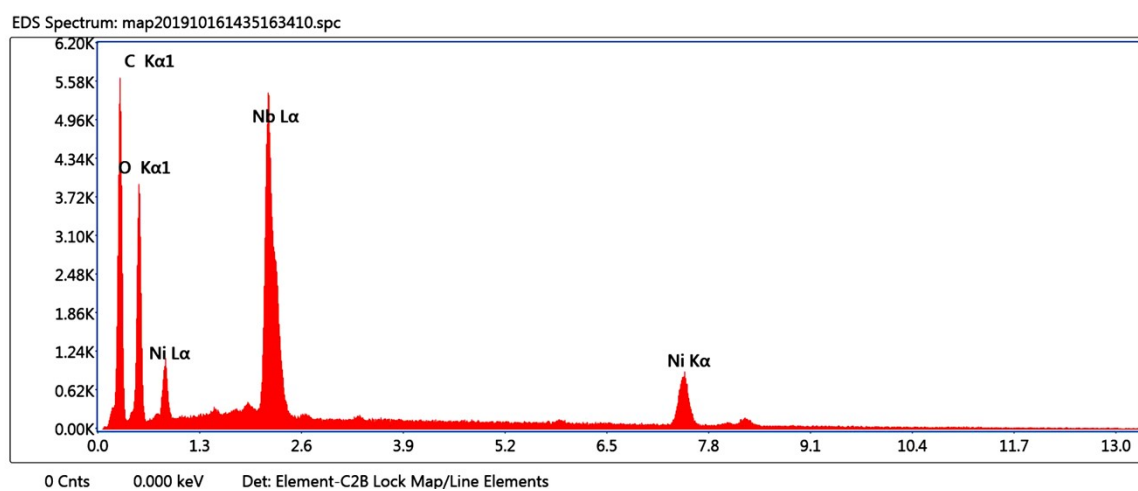

**Figure S1.**

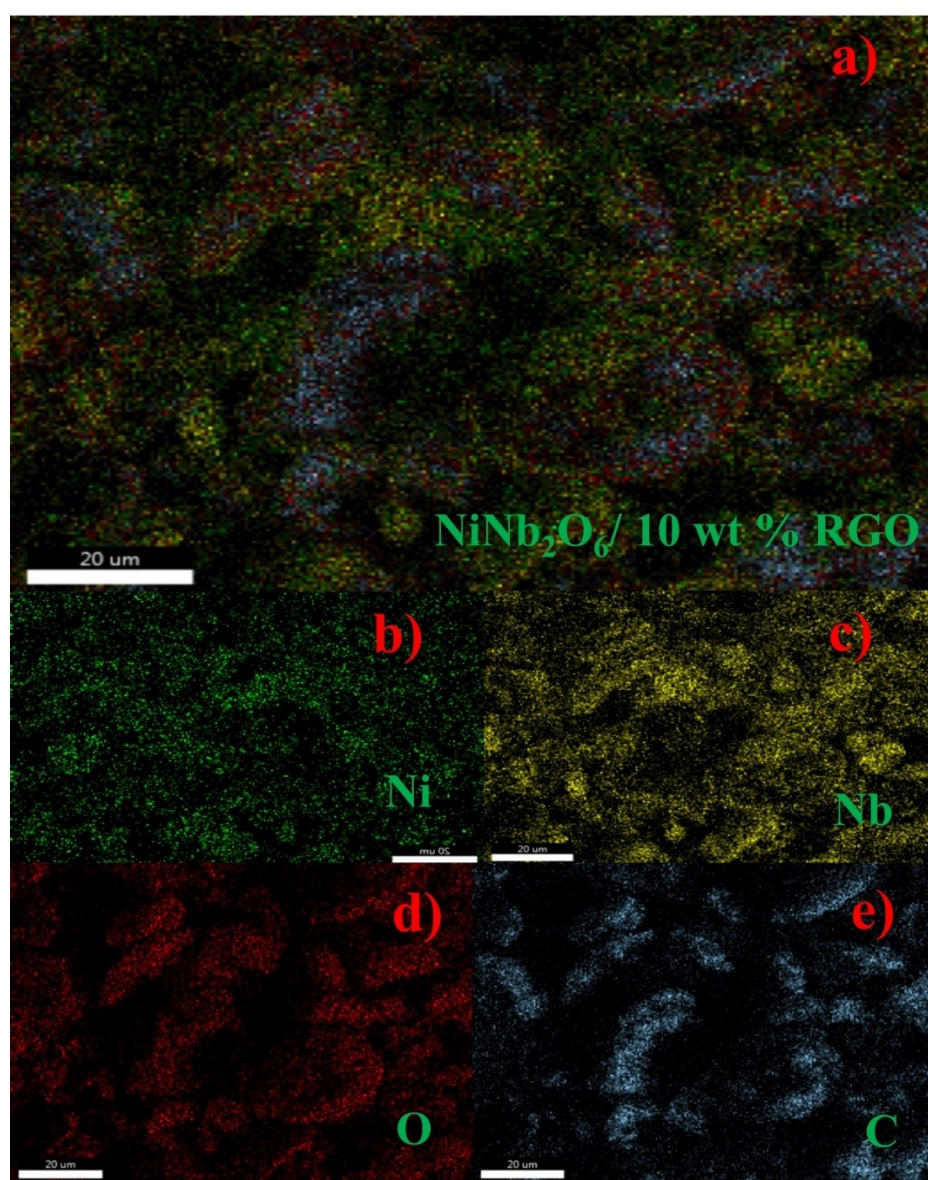

**Figure S2**

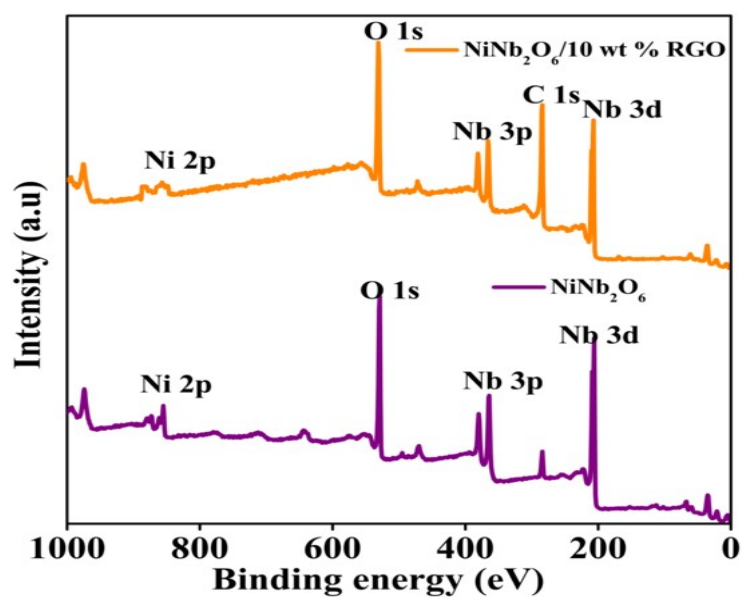

Figure S3

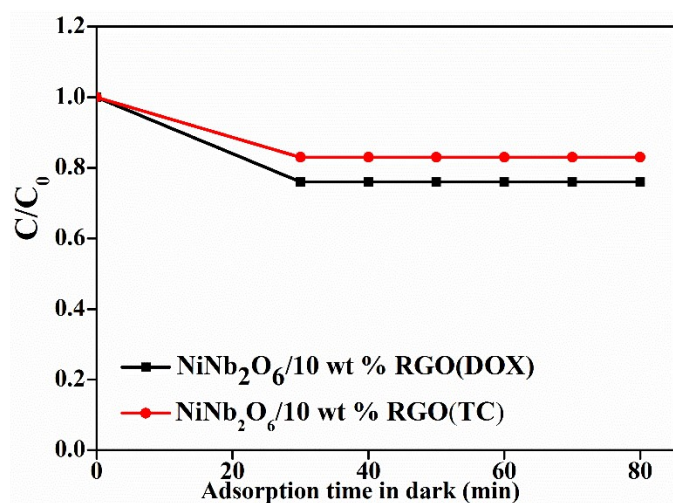

Figure S4

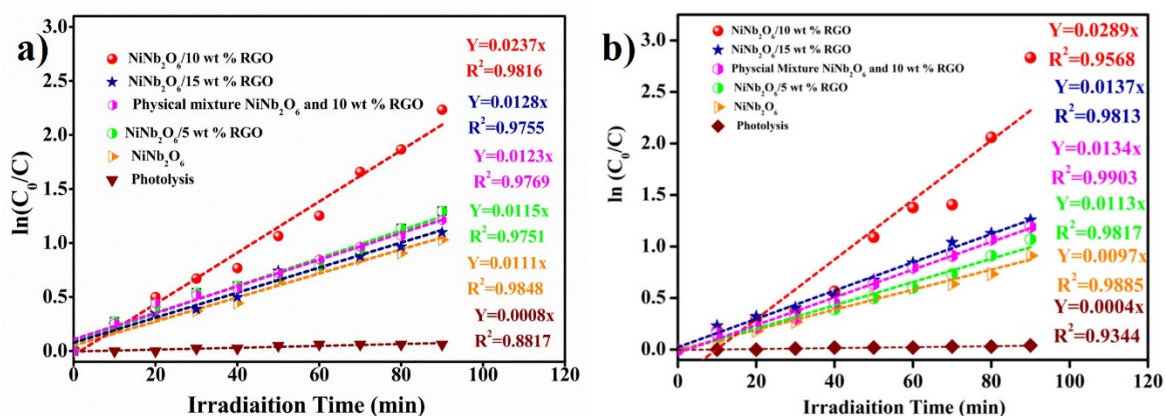

Figure S5

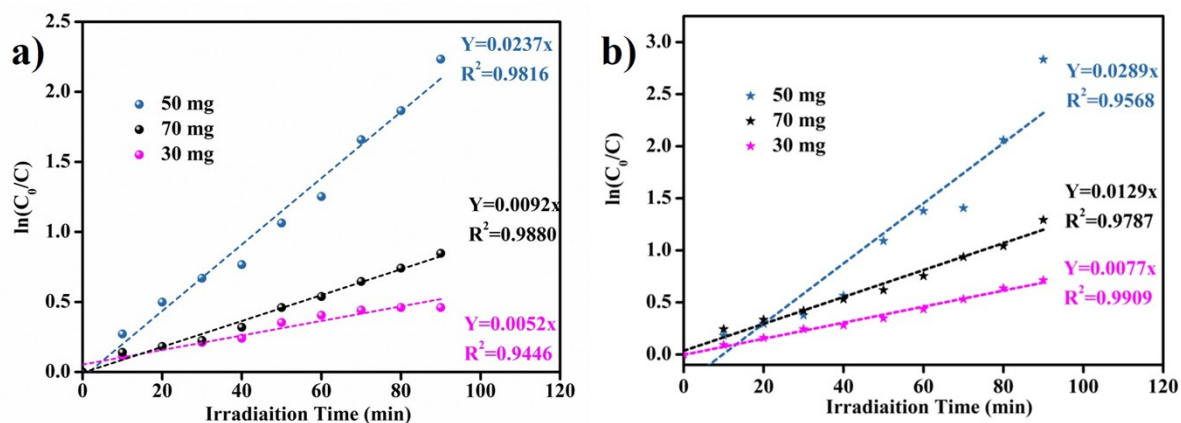

Figure S6.

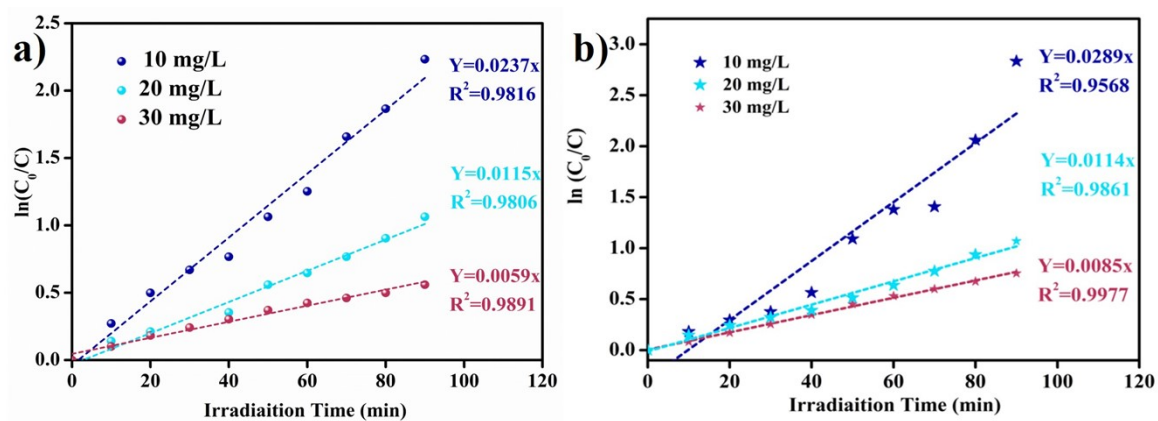

Figure S7.

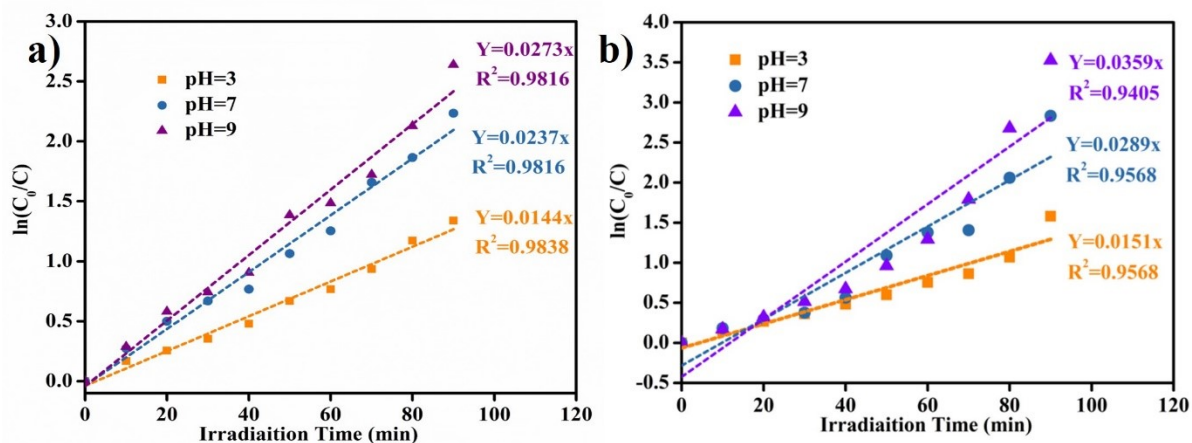

Figure S8.

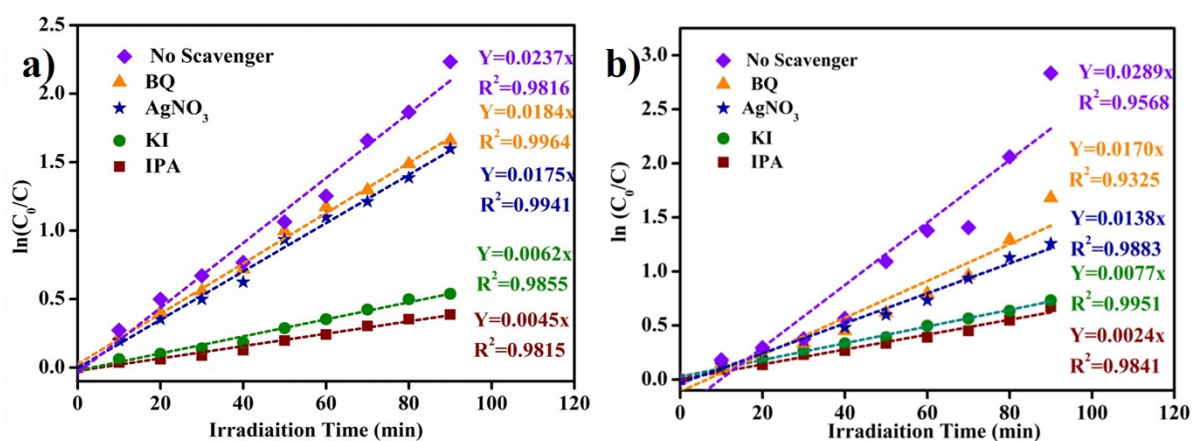

Figure S9.

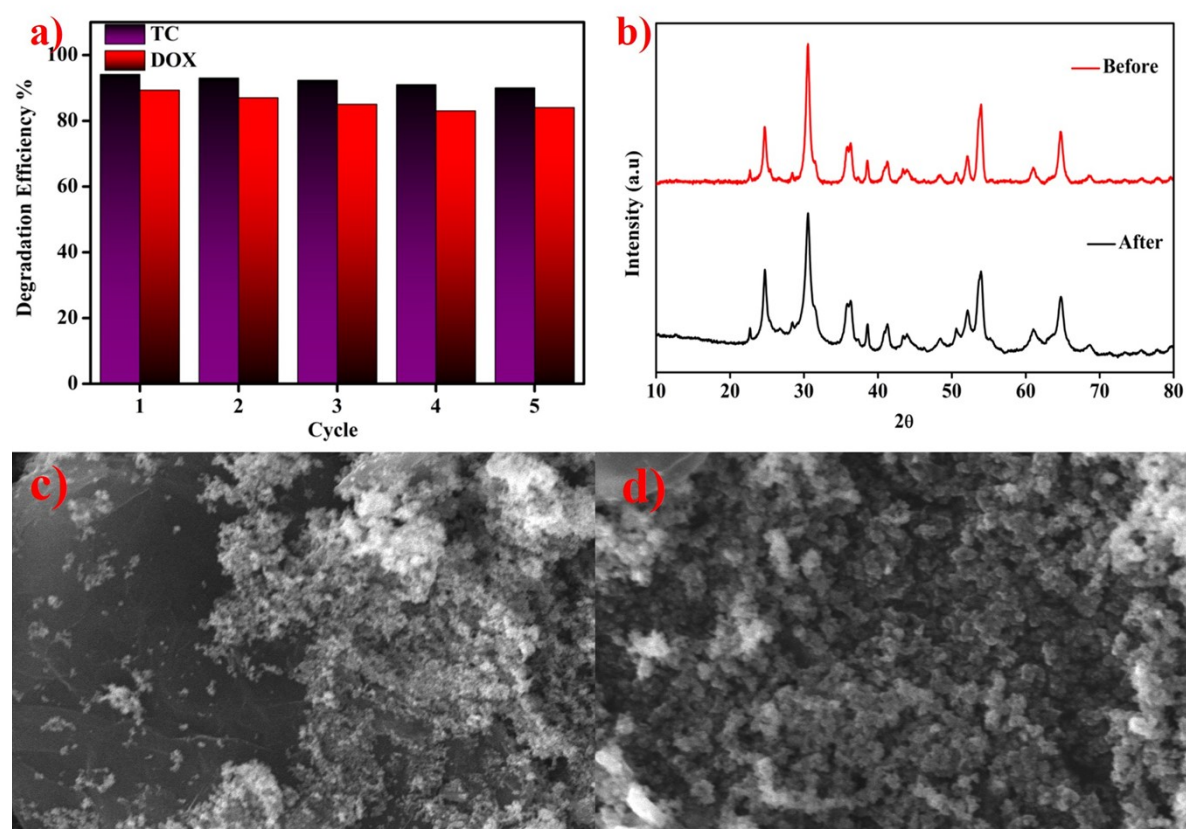

Figure S10.

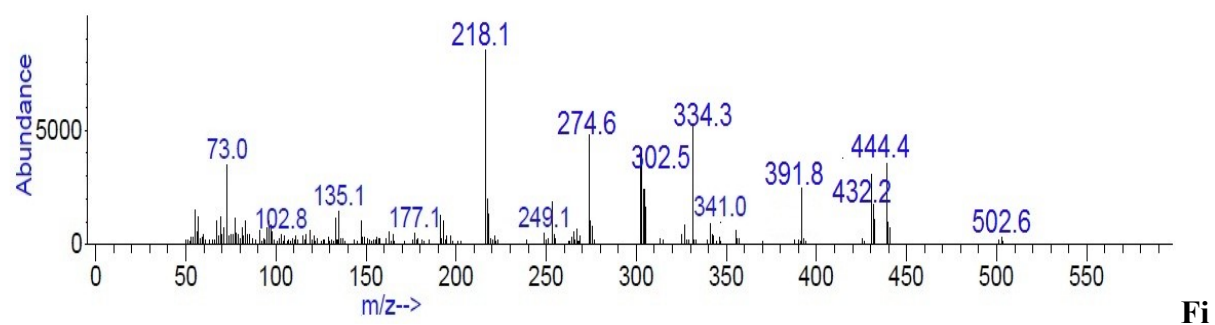

Figure S11.

**Table S1.**

| Photocatalyst                                                                    | Light Source               | Pollutant     | Dosage | Time (min) | Percentage of degradation | Ref       |
|----------------------------------------------------------------------------------|----------------------------|---------------|--------|------------|---------------------------|-----------|
| TCPP/Bi <sub>2</sub> MoO <sub>6</sub>                                            | 300W-Xe lamp > 420 nm      | TC (20 mg/L)  | 10 mg  | 60         | 85.7%                     | 1         |
| Bi <sub>2</sub> Sn <sub>2</sub> O <sub>7</sub> /Bi <sub>2</sub> MoO <sub>6</sub> | 300W-Xe lamp > 400 nm      | TC (20 mg/L)  | 35 mg  | 100        | 98.7%                     | 2         |
| Ag/Ag <sub>2</sub> S/Bi <sub>2</sub> MoO <sub>6</sub>                            | 300W-Xe lamp > 400 nm      | TC (20mg/L)   | 30 mg  | 100        | 92.8%                     | 3         |
| C-doped Bi <sub>2</sub> MoO <sub>6</sub> /In <sub>2</sub> O <sub>3</sub> -ZnO    | 500W-Xe lamp               | DOX (20mg/L)  | 50 mg  | 40         | 99.7%                     | 4         |
| BiOBr/FeWO <sub>4</sub>                                                          | 300W-Xe lamp> 400 nm       | DOX (10mg/L)  | 100 mg | 60         | 90.4%                     | 5         |
| α-Bi <sub>2</sub> O <sub>3</sub> /g-C <sub>3</sub> N <sub>4</sub>                | 150W-Xe lamp > 420 nm      | DOX (10mg/L)  | 25 mg  | 120        | 80.5%                     | 6         |
| NiNb <sub>2</sub> O <sub>6</sub> /RGO                                            | 300W-tungsten lamp> 420 nm | TC (10mg/L)   | 50 mg  | 80         | 94.1 %                    | This work |
| NiNb <sub>2</sub> O <sub>6</sub> /RGO                                            | 300W-tungsten lamp> 420 nm | DOX (10 mg/L) | 50 mg  | 80         | 89.2 %                    | This work |

## References

1. C. Wang, M. Cai, Y. Liu, F. Yang, H. Zhang, J. Liu, S. Li, J. Colloid Interface Sci., 2022, **605**, () 727–740.
2. S. Li, C. Wang, Y. Liu, M. Cai, Y. Wang, H. Zhang, Y. Guo, W. Zhao, Z. Wang, X. Chen, Chem. Eng. Sci., 2022, **429**, () 132519.
3. S. Li, C. Wang, Y. Liu, B. Xue, W. Jiang, Y. Liu, L. Mo, X. Chen, Chem. Eng. Sci., 2021, **415**, 128991.
4. H. Li, J. Li, P. Yang, D. H.L. Ng, X. Cui, F. Ji, J. Environ. Sci., 2019, **79**, 54-66.
5. J. Gao, Y. Gao, Z. Sui, Z. Dong, S. Wang, D. Zou, J. Alloys Compd., 2018, **732**, 43-51.
6. W. Liu, Z. Li, Q. Kang, L. Wen, Environ. Res., 2021,197, 110925.
